# Supplementary material for: Genetic diversity of 1-deoxy-D-xylulose 5-phosphate synthase gene (SmDXS) among the cultivated Danshen (Salvia miltiorrhiza) populations
Source: Research Square preprint supplement (doi:10.21203/rs.3.rs-2675855/v1), 2023-03-17
Supplement: Supplementary file 1 [file 05912df1397763f339510540.docx]

GGTTACTGATCTGTCCTCTGTAAATGCGCCACCCATAAAGCCATATGCACAAACCAATCCCACCAACATTTTGTTCCTTAACAATCCCTGCATTTAATCC**AAGCCCTCATCATTCCCATCA**TTTTCACACACACACACACAGTGGCTAGTGTTCTTGAGAGAAGTTCAAAAACAGAGC

**→ DXS-FP1**

CCACCTCAAGAGCTGGTGCATGAACAGATAGTAAAGTTGGTATCTTTTTTCTGGGAAATCTGCAATCTTTGATTGTTTGGAGTGAAATTTTGAGCTGTCTATACACACATACAAGATGGCTTTATGCCCATTTGCATTTTCTGGGAGTTTAGTAGCTGCAGATGCTCAAAAGCACACCAATTTCTGCTCTCAGTGGCTACATGGTGCAGATCTACCATTTCACCCCTTCTGCAAGAACAGTCAGATTAGGAAAAGCTCTACAGGAATTTGTGCAACACTGTCTGAAAGAGGGGAATACTTCTCACAAAAGCCTCCAACTCCCCTTTTAGACACAATCAACTATCCAATTCACATGAAAAACCTCTCCACTAAGGAACTGCAACAACTCGCCGACGAACTGCGGTCCGACGTCATCTTCAACGTGTCCAAGACTGGGGGTCACCTGGGATCAAGCCTTGGTGTGATTGAGCTAACCGTGGCTCTTCATTACGTGTTCAATGCTCCTCAAGATCGAATTCTGTGGGATGTTGGCCACCAGGCTTATCCACACAAGATTCTGACAGGAAGAAGAGACAGGATGCCGAGTTTAAGACAGACCGGTGGCCTCTCTGGTTTCA**CGAAGCG**

**→ DXS-FP2**

**GTCTGAGAGCGACTA**CGACTGCTTTGGCGCCGGTCACAGTTCCACAACTATCTCTGCAGGACTAGGAATGGCTGTGGGGAGGGATCT

GAAAGGAAGAAAGGACAACGTCGTGGCTGTGATAGGCGACGGGGCTATGACAGCTGGTCAGGCCTATGAGGCAATGAAC**AATGCTGGCTACCTGGACTCG**GACATGATTGTTATTCTCAATGACAATAAGCAAGTTTCCTTGCCTACTGCCAATCTGGATGGGCCAACTGCTCCCG

**← DXS-RP1**

TGGGAGCCTTGAGCAGTGCTTTGAGTAGGTTGCAGTCGAACCGGCCTCTCAGAGAGCTAAGGGAAGTCGCGAAGGGAGTCACCAAGCAGATCGGAGGGCCTATGCACGAGCTTGCTGCAAAAGTCGATGAGTATGCTCGTGGGCTGATCAGTGGCTCTGGATCAACACTCTTTGAAGAGCTCGGGCTTTACTACATCGGTCCAGTTGATGGTCACAATCTTGATGACCTGACAGCGATTCACAGAGAGGTCAAGAGTACTAAAACGACGGGTCCGGTGTTGATCCATGTTGTGACTGAGAAAGGCAGAGGATATCCTTATGCAGAGAAAGCTGCAGATAAATACCATGGAGTGACCAAGTTCGATCCAGCAACGGGGAAGCAGTTTAAATCGAGTGCTCCAACTCAGCCTTACACAACCTACTTTGCTGAGGCCCTGATTGCAGAAGCTGAAGTAGACAAGGATATCGTAGCAATCCATGCAGCAATGGGAGGTGGGACGGGTTTGAACCTCTTCCAACGCCGTTTCCCAACGAGGTGTTTCGATGTTGGGATAGCAGAACAGCATGCTGTGACTTTTGCTGCAGGTTTGGCCTGTGAAGGGATCAAGCCCTTCTGTGCAATCTACTCATCCTTCTTGCAACGAGGCTACGACCAGGTAGTGCACGACGTGGATTTGCAGAAGCTGCCG**GTTAGGTTTGCTATGGACA**

**→DXS-FP3**

**GAG**CCGGCTTGGTGGGAGCGGATGGCCCGACACATTGTGGAGCTTTTGATGTTACATTCATGGCATGCCTTCCCAACATGGTGGTGATGGCTCCTTCAGATGAGGCTGAATTGTTTAACATGGTTGCAACTGCTGCAGCTATAGACGACAGACCAAGCTGCTTCCGTTATCCAAGAGGCAACGGTATAGGTGTGGAGTTGCCGCCCGGAAACAAAGGCAAACCCCTCGAGATTGGAAAGGGCCGTATACTAATTGAAGGGGAGAGGGTGGCTCTCTTGGGTTATGGATCAGCAGTTCAGAGCTGTTTGGCTGCAGCTGCCTTGGTAGAAACCCGCGGTTTACA**GTTGACAGTAGCCGATGCTCGT**TTCTGTATGCCATTGGATCATGCTCTTATTCGGAGCTTGGCCAAATCACACGAGGTCTTGATCACTGTGGAAGAAGG

**←DXS-RP2**

GTCAATTGGTGGTTTTGGATCTCATGTAGCTCACTTCATGGCCTTGGATGGCCTCCTTGATGGCAACCTAAAGTGGAGACCATTGGTTCTTCCTGATCGATACATCGACCATGGAGCCCCGGTGGATCAACTGATGGAAGCAGGACTCACGCCTTCACACATCGCGGCGACTGTCTTTAATATTCTAGGAAAAGCTAGGGAGGCTCTGGAAATTATGTCATAGATCGAAGAGCTGTACAAAAAACAACAAACTCTGAAATA**TAGTGTTAGCTTCAGCTTGTCT**AAAAAAAAAAAAAAAAAAAAA

**←DXS-RP3**

**Supplement Fig. 1** *SmDXS* primer positions within the reference accession EU670744.1

**Supplement Table 1** GenBank accessions of the 1-deoxy-D-xylulose 5-phosphate synthase gene (*SmDXS*) of the cultivated Danshen (*Salvia miltiorrhiza*)populations

| Serial | Population code | GenBank Accession | Serial | Population code | GenBank Accession |
| --- | --- | --- | --- | --- | --- |
| 1 | V-JLCC-V-1 | ON408275 | 20 | W-GD-V-2 | ON408255 |
| 2 | V-GZZY-V-1 | ON408274 | 21 | W-JS-V-2 | ON408256 |
| 3 | V-JSSY-V-1 | ON408271 | 22 | S-SDYT-V-1 | ON408260 |
| 4 | V-YNLJ-V-1 | ON408273 | 23 | S-HNFC-V-1 | ON408261 |
| 5 | V-GD-V-1 | ON408278 | 24 | S-HNCS-V-1 | ON408262 |
| 6 | V-CQ-V-1 | ON408279 | 25 | S-SDJX-V-1 | ON408285 |
| 7 | V-SD-V-2 | ON408277 | 26 | S-GSJQ-V-1 | ON408281 |
| 8 | V-GZ-V-2 | ON408270 | 27 | S-NM-V-1 | ON408265 |
| 9 | V-JS-V-2 | ON408269 | 28 | S-GX-V-1 | ON408264 |
| 10 | V-BJ-V-1 | ON408272 | 29 | S-HBAG-V-1 | ON408263 |
| 11 | V-HBAG-V-1 | ON408276 | 30 | B-AHQJ-V-1 | ON408280 |
| 12 | V-GSLX-V-1 | ON408283 | 31 | B-SCZJ-V-1 | ON408284 |
| 13 | W-HBJM-V-1 | ON408251 | 32 | B-SD-V-2 | ON408267 |
| 14 | W-SXXA-V-1 | ON408252 | 33 | B-SC-V-2 | ON408266 |
| 15 | W-LNSY-V-1 | ON408254 | 34 | B-JS-V-2 | ON408250 |
| 16 | W-FJLY-V-1 | ON408253 | 35 | B-GD-V-2 | ON408268 |
| 17 | W-SD-V-1 | ON408257 | 36 | CYSWC-DZH-V-4 | ON408282 |
| 18 | W-SC-V-2 | ON408258 | 37 | Q-DZH-V-4 | ON408286 |
| 19 | W-GZ-V-2 | ON408259 | 38 | W-SCHY-W-1 | ON408249 |
